# Supplementary material
Source: publisher figshare collection journal article supplement (https://gsajournals.figshare.com/articles/dataset/_/22209697)
Supplement: Supplementary file 1 [file 1]

## List and captions of supplementary materials

**Figure S1.** Illumina short read (A) and PacBio long-read (B) coverage along the MitoVGPassembly. Coverage is shown as percentage of highest read coverage in bins of 10%. The insertion in the MitoVGPassembly relative to the mitoFinderassembly and mitogenomes of Isabelline and Northern Wheatear is situated between the green demarkations.

**Figure S2.** Frequencies of GO terms in the *Oenanthe melanoleuca* reference genome annotation.

**File S1.** Library of consensus sequences of transposable elements and satellite DNA monomers for the species *Oenanthe melanoleuca* produced by RepeatModeler2 and RepeatExplorer2.

**File S2.** Repeat annotation of the *Oenanthe melanoleuca* genome assembly with divergence from consensus calculated with Kimura-2 parameter distance model and corrected for the presence of CpG sites.

**Table S1.** Summary table of the percentages of repeats annotated in the genome assembly of *Oenanthe melanoleuca*.
