# Supplementary material
Source: publisher figshare collection journal article supplement (https://gsajournals.figshare.com/articles/dataset/_/22209697)
Supplement: Supplementary file 2 [file 1]

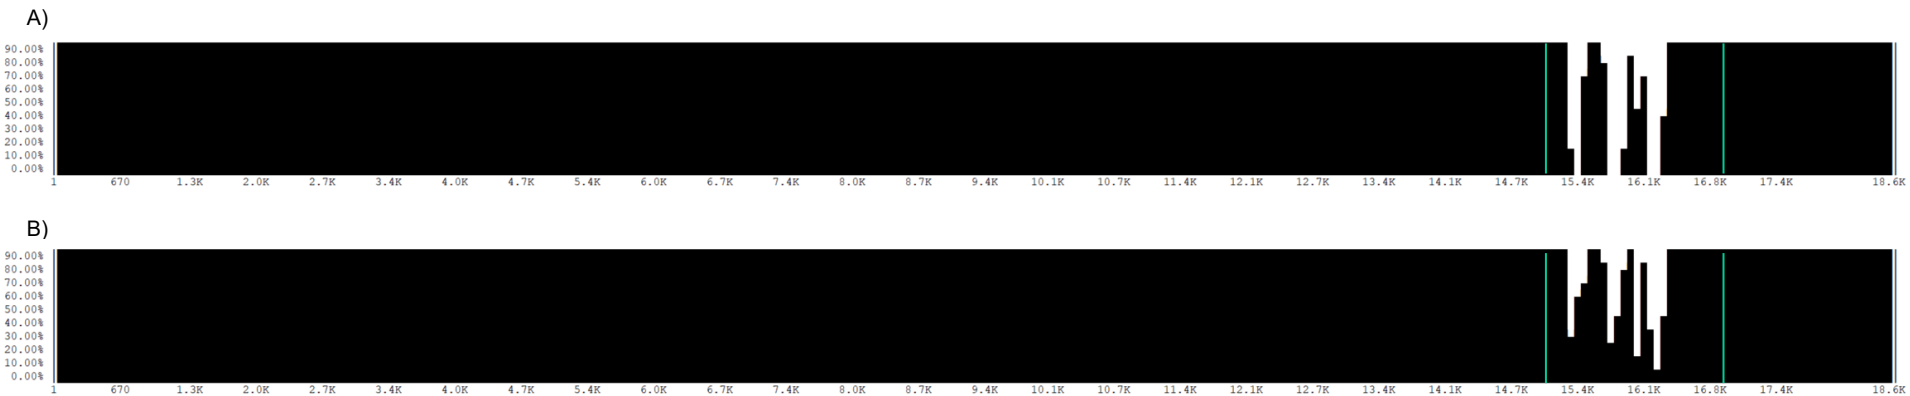

**Figure S1.** Illumina short read (A) and PacBio long-read (B) coverage along the MitoVGP assembly. Coverage is shown as percentage of highest read coverage in bins of 10%. The insertion in the MitoVGP assembly relative to the mitoFinder assembly and mitogenomes of Isabelline and Northern Wheatear is situated between the green demarkations.
